# Supplementary material for: Compliment Graphene Oxide Coating on Silk Fiber Surface via Electrostatic Force for Capacitive Humidity Sensor Applications
Source: PubMed Central journal article supplement (PMC5335967; doi:10.3390/s17020407), 2017-02-19
Supplement: sensors-17-00407-s001.pdf [file sensors-17-00407-s001.pdf]

## Supporting Information

# Compliment Graphene Oxide Coating on Silk Fiber Surface via Electrostatic Force for Capacitive Humidity Sensor Applications

Kook In Han, Seungdu Kim, In Gyu Lee, Jong Pil Kim, Jung-Ha Kim, Suck Won Hong, Byung Jin Cho, and Wan Sik Hwang

**Table S1.** Triboelectric table predicting which will become positive vs. negative and how strong the effect will be.<sup>1</sup>

| Insulator name                                                                              | Charge affinity nC/J | Metal effect <sup>2</sup> |
|---------------------------------------------------------------------------------------------|----------------------|---------------------------|
| Polyurethane foam                                                                           | +60                  | +N                        |
| Sorbothane                                                                                  | +58                  | -W                        |
| Box sealing tape (BOPP)                                                                     | +55                  | +W                        |
| Hair, oily skin                                                                             | +45                  | +N                        |
| Solid polyurethane, filled                                                                  | +40                  | +N                        |
| Magnesium fluoride (MgF <sub>2</sub> )                                                      | +35                  | +N                        |
| Nylon, dry skin                                                                             | +30                  | +N                        |
| Machine oil                                                                                 | +29                  | +N                        |
| Nylatron (nylon filled with MoS <sub>2</sub> )                                              | +28                  | +N                        |
| Glass (soda)                                                                                | +25                  | +N                        |
| Paper (uncoated copy)                                                                       | +10                  | -W                        |
| Wood (pine)                                                                                 | +7                   | -W                        |
| GE brand Silicone II (hardens in air)                                                       | +6                   | +N                        |
| Cotton                                                                                      | +5                   | +N                        |
| Nitrile rubber                                                                              | +3                   | -W                        |
| Wool                                                                                        | 0                    | -W                        |
| Polycarbonate                                                                               | -5                   | -W                        |
| ABS                                                                                         | -5                   | -N                        |
| Acrylic (polymethyl methacrylate) and adhesive side of clear carton-sealing and office tape | -10                  | -N                        |
| Epoxy (circuit board)                                                                       | -32                  | -N                        |
| Styrene-butadiene rubber (SBR, Buna S)                                                      | -35                  | -N                        |
| Solvent-based spray paints                                                                  | -38                  | -N                        |
| PET (mylar) cloth                                                                           | -40                  | -W                        |
| PET (mylar) solid                                                                           | -40                  | +W                        |
| EVA rubber for gaskets, filled                                                              | -55                  | -N                        |
| Gum rubber                                                                                  | -60                  | -N                        |
| Hot melt glue                                                                               | -62                  | -N                        |
| Polystyrene                                                                                 | -70                  | -N                        |
| Polyimide                                                                                   | -70                  | -N                        |
| Silicones (air harden & thermoset, but <i>not</i> GE)                                       | -72                  | -N                        |
| Vinyl: flexible (clear tubing)                                                              | -75                  | -N                        |
| Carton-sealing tape (BOPP), sanded down                                                     | -85                  | -N                        |
| Olefins (alkenes): LDPE, HDPE, PP                                                           | -90                  | -N                        |
| Cellulose nitrate                                                                           | -93                  | -N                        |
| Office tape backing (vinyl copolymer?)                                                      | -95                  | -N                        |
| UHMWPE                                                                                      | -95                  | -N                        |
| Neoprene (polychloroprene, <i>not</i> SBR)                                                  | -98                  | -N                        |
| PVC (rigid vinyl)                                                                           | -100                 | -N                        |
| Latex (natural) rubber                                                                      | -105                 | -N                        |
| Viton, filled                                                                               | -117                 | -N                        |

|                                |      |    |
|--------------------------------|------|----|
| Epichlorohydrin rubber, filled | -118 | -N |
| Santoprene rubber              | -120 | -N |
| Hypalon rubber, filled         | -130 | -N |
| Butyl rubber, filled           | -135 | -N |
| EDPM rubber, filled            | -140 | -N |
| Teflon                         | -190 | -N |

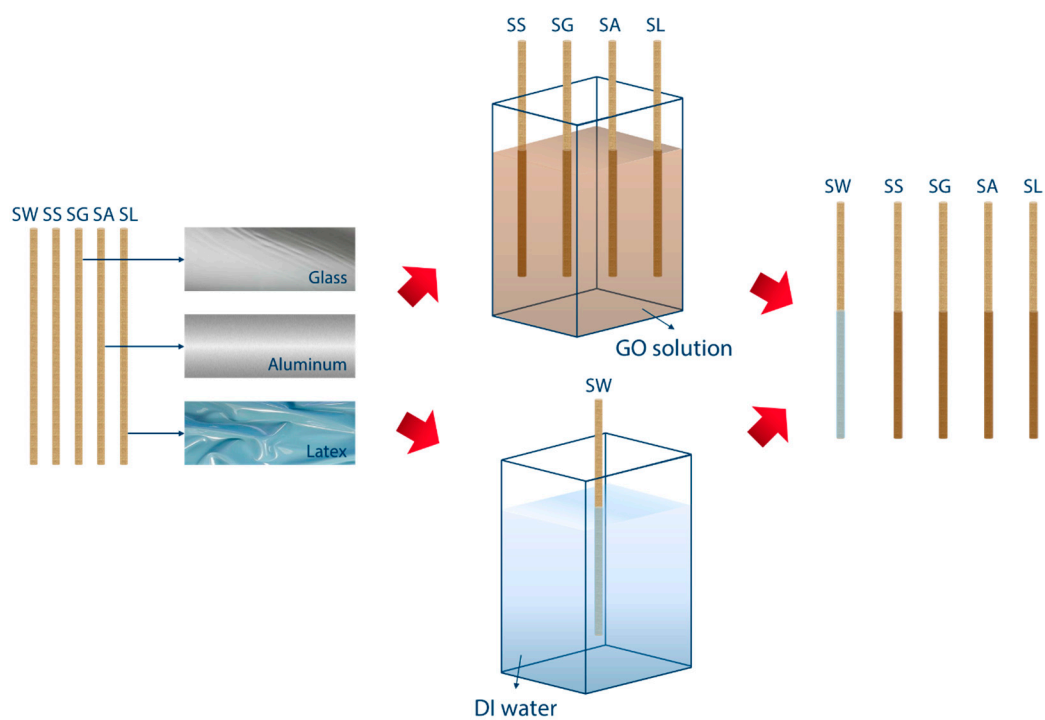

**Figure S1.** Schematic drawing of various GO coating process on SF. For comparison, DI-soaked SF (SW) was also prepared.

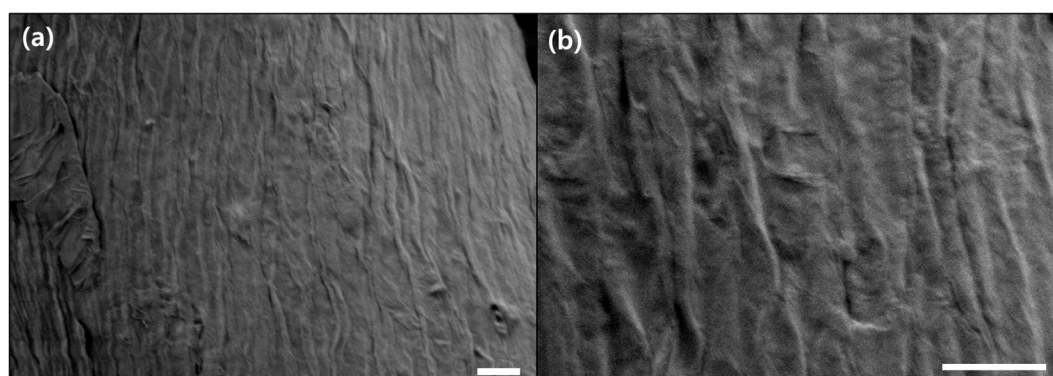

**Figure S2.** (a) and (b) SEM images of GO-coated SF (SL) (scale bar: 1 μm)

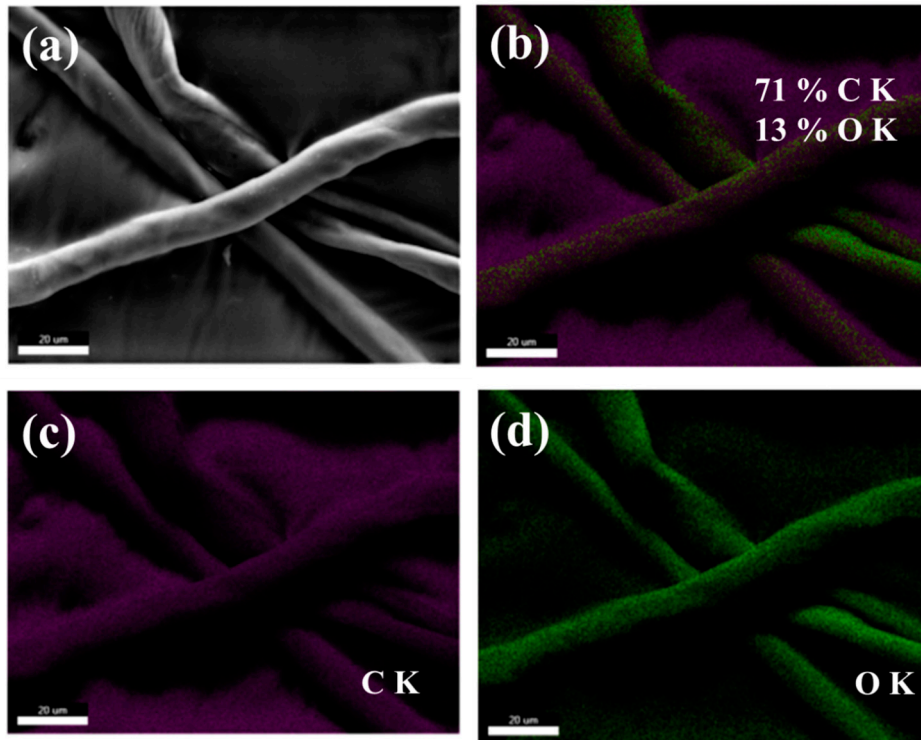

**Figure S3.** EDS images of GO-coated SF (SL) along with the quantitative data. (a) SEM image of the SL, (b) the elemental maps using both C K and O K, (c) C K, and (d) O K. (scale bar : 20μm)

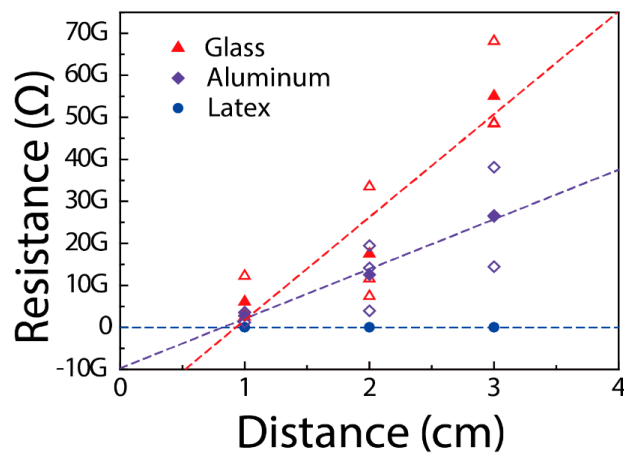

**Figure S4.** Resistance of GO-coated SF at various conditions as a function of distance; SFs were rubbed with each material (glass, aluminum, and latex) before soaking in GO solution.

#### Supplementary References

- 1 Tests were performed by Bill Lee (Ph.D., physics) ©2009 by AlphaLab, Inc. (TriField.com), which also manufactured the test equipment used. This table may be reproduced only if reproduced in whole.
- 2 Charge acquired if rubbed with metal (W = weak, N = normal, or consistent with the affinity).
